# Supplementary material for: Haplotype Combinations of Calpain 10 Gene Polymorphisms Associate With Increased Risk of Impaired Glucose Tolerance and Type 2 Diabetes in South Indians
Source: Oxford University Press journal article supplement (doi:10.2337/diabetes.51.5.1622), 2002-05-01
Supplement: diabetes5151622-sup-db000449app.doc [file diabetes5151622-sup-db000449app.doc]

ONLINE APPENDIX

| Four locus Haplotypes 44/43/19/63 | Observed Transmissions to affected offspring | Expected Transmissions to affected offspring | South Indian Families (n=95)  p values ;1df |
| --- | --- | --- | --- |
| 1**121** | 91 | 100 | 0.18 |
| 2**121** | 1.0 | 1.5 | 0.26 |
| 1221 | 40 | 39 | 0.81 |
| 1111 | 45 | 41 | 0.32 |
| 2111 | 53 | 49 | 0.34 |
| 2211 | < 1 | <1 | 0.29 |
| 1122 | <1 | 1.3 | 0.28 |
| 1222 | <1 | <1 | 1.0 |
| 1**112** | 12 | 10 | 0.56 |
| GLOBAL p value based on a 1000 bootstrap sample=1.0 | | | |

Transmission of haplotypes to affected offspring within families using TRANSMIT.

| HAPLO  COMBS | NGT  n=297 | | IGT/IFG  n=55 | | T2DM  n=84 | | PROBANDS  n=92 | |
| --- | --- | --- | --- | --- | --- | --- | --- | --- |
|  | FREQ | n | FREQ | n | FREQ | n | FREQ | n |
| 1111/1111 | 0.054 | 16 | 0.018 | 1 | 0.036 | 3 | 0.05 | 5 |
| 1111/1112 | 0.017 | 5 | 0.018 | 1 | 0.00 | 0 | 0.01 | 1 |
| 1111/1121 | 0.19 | 56 | 0.20 | 11 | 0.23 | 19 | 0.098 | 9 |
| 1111/1221 | 0.067 | 20 | 0.09 | 5 | 0.11 | 9 | 0.05 | 5 |
| 1111/2111 | 0.067 | 20 | 0.036 | 2 | 0.08 | 7 | 0.09 | 8 |
| 1112/1121 | 0.009 | 3 | 0.09 | 5 | 0.06 | 5 | 0.05 | 5 |
| 1112/1221 | 0.00 | 0 | 0.036 | 2 | 0.0 | 0 | 0.04 | 4 |
| 1112/2111 | 0.007 | 2 | 0.018 | 1 | 0.0 | 0 | 0.01 | 1 |
| 1121/1121 | 0.18 | 54 | 0.125 | 7 | 0.17 | 14 | 0.12 | 11 |
| 1121/1221 | 0.11 | 32 | 0.14 | 8 | 0.05 | 4 | 0.13 | 12 |
| 1121/2111 | 0.20 | 58 | 0.16 | 9 | 0.17 | 14 | 0.18 | 18 |
| 1221/1221 | 0.017 | 5 | 0.018 | 1 | 0.012 | 1 | 0.03 | 3 |
| 1221/2111 | 0.05 | 15 | 0.018 | 1 | 0.07 | 6 | 0.06 | 6 |
| 2111/2111 | 0.037 | 11 | 0.018 | 1 | 0.02 | 2 | 0.05 | 5 |

Frequencies of all identified haplotype combination in the study groups
